# Supplementary material for: Tucatinib vs Placebo, Both in Combination With Trastuzumab and Capecitabine, for Previously Treated ERBB2 (HER2)-Positive Metastatic Breast Cancer in Patients With Brain Metastases: Updated Exploratory Analysis of the HER2CLIMB Randomized Clinical Trial
Source: PubMed Central journal article supplement — JAMA Oncol. 2022 Dec 1;9(2):197–205. doi: 10.1001/jamaoncol.2022.5610 (PMC9716438; doi:10.1001/jamaoncol.2022.5610), 2022-12-01
Supplement: jamaoncol-e225610-s002.pdf [file jamaoncol-e225610-s002.pdf]

## Data Sharing Statement

Lin. Tucatinib vs Placebo, Both in Combination With Trastuzumab and Capecitabine, for Previously Treated ERBB2 (HER2)-Positive Metastatic Breast Cancer in Patients With Brain Metastases. *JAMA Oncol.* Published December 01, 2022. doi:10.1001/jamaoncol.2022.5610

### Data

**Data available:** Yes

**Data types:** Deidentified participant data

**How to access data:** All requests can be submitted to [CTDR@seagen.com](mailto:CTDR@seagen.com) and will be reviewed by an internal review committee.

**When available:** With publication

### Supporting Documents

**Document types:** None

### Additional Information

**Who can access the data:** De-identified patient-level trial data that underlie the results reported in this publication will be made available on a case-by-case basis to researchers who provide a methodologically sound proposal.

**Types of analyses:** De-identified patient-level trial data that underlie the results reported in this publication will be made available on a case-by-case basis to researchers who provide a methodologically sound proposal.

**Mechanisms of data availability:** De-identified patient-level trial data that underlie the results reported in this publication will be made available on a case-by-case basis to researchers who provide a methodologically sound proposal.
